# Supplementary material for: Effect of Fat to Lean Meat Ratios on the Formation of Volatile Compounds in Mutton Shashliks
Source: MDPI journal article supplement (doi:10.3390/foods12101929), 2023-05-09
Supplement: s1 [file s1]

Table S1. Ten electronic nose sensors and their compound detection sensitivity.

| Sensor array | Sensor code | Substances for sensing                                      | Sensitivity                               |
|--------------|-------------|-------------------------------------------------------------|-------------------------------------------|
| R1           | W1C         | Generally aromatic compounds                                | Toluene, 10 mL/m <sup>3</sup>             |
| R2           | W5S         | Highly sensitive to nitrogen oxides                         | nitrogen dioxide,<br>1 mL/m <sup>3</sup>  |
| R3           | W3C         | Ammonia, also sensitive to aromatic compounds               | Benzene, 10 mL/m <sup>3</sup>             |
| R4           | W6S         | High selectivity for hydrogen compounds                     | hydrogen, 100 mL/m <sup>3</sup>           |
| R5           | W5C         | Sensitive to short chain alkanes                            | Propane, 1 mL/m <sup>3</sup>              |
| R6           | W1S         | Sensitive to methyl compounds                               | methane, 100 mL/m <sup>3</sup>            |
| R7           | W1W         | Sensitive to inorganic sulphur compounds                    | hydrogen sulfide,<br>1 mL/m <sup>3</sup>  |
| R8           | W2S         | Sensitive to alcohols and carbonyls (aldehydes and ketones) | carbon monoxide,<br>100 mL/m <sup>3</sup> |
| R9           | W2W         | Reactive with aromatic and organic sulphur compounds        | hydrogen sulfide,<br>1 mL/m <sup>3</sup>  |
| R10          | W3S         | Selective for long chain alkanes                            | methane, 10 mL/m <sup>3</sup>             |
